# Supplementary material
Source: MDPI journal article supplement (https://www.mdpi.com/1424-2818/14/11/939)
Supplement: s1 [file s1]

## Supplementary Materials

Table S1. Regression models of moose harvest (t) against moose harvest (t-1)[ml], wolf harvest (t-1) [wll], wolf harvest (t-2) [wl2] , wolf harvest (t-3) [wl3], wolf harvest (t-4) [wl4], and wolf harvest (t-5) [wl5] for GMU 13, south-central Alaska, USA, 1973-2020. Coefficients marked "\*" had 85% confidence intervals overlapping 0. In addition to model coefficients, model  $r^2$  values, Durbin-Watson statistics (DW), conditional AIC (AICc), and AIC weights (w) are provided.

| Model  | B <sub>0</sub> | ml    | wll    | wl2     | wl3     | wl4     | wl5     | $r^2$ | DW    | AICc  | w     |
|--------|----------------|-------|--------|---------|---------|---------|---------|-------|-------|-------|-------|
| ml     | 433.0          | 0.475 |        |         |         |         |         | 0.210 | 2.060 | 498.8 | 0.463 |
| ml,wll | 563.5          | 0.425 | -0.758 |         |         |         |         | 0.236 | 2.108 | 498.5 | 0.537 |
| ml,wl2 | 547.8          | 0.423 |        | -0.609* |         |         |         | 0.220 | 2.072 | 499.5 |       |
| ml,wl3 | 550.2          | 0.422 |        |         | -0.640* |         |         | 0.219 | 2.058 | 499.6 |       |
| ml,wl4 | 543.0          | 0.429 |        |         |         | -0.629* |         | 0.220 | 2.072 | 499.5 |       |
| ml,wl5 | 539.4          | 0.421 |        |         |         |         | -0.629* | 0.223 | 2.023 | 499.4 |       |

Table S2. Regression models of moose harvest (t) against moose harvest (t-1)[ml], wolf harvest (t-1) [wl1], wolf harvest (t-2) [wl2] for subunits A, B, C, and E of GMU 13, south-central Alaska, USA, 1983-2020. Coefficients marked "\*" had 85% confidence intervals overlapping 0. In addition to model coefficients, model  $r^2$  values, Durbin-Watson statistics (DW), conditional AIC (AICc), and AIC weights (w) are provided.

| Model  | B <sub>0</sub> | ml    | wl1    | wl2     | $r^2$ | DW    | AICc   | w     |
|--------|----------------|-------|--------|---------|-------|-------|--------|-------|
| ml     | 52.9           | 0.717 |        |         | 0.505 | 2.176 | 1170.8 | 0.378 |
| ml,wl1 | 69.6           | 0.700 | -0.483 |         | 0.512 | 2.204 | 1169.8 | 0.622 |
| ml,wl2 | 58.3           | 0.710 |        | -0.144* | 0.502 | 2.154 | 1172.7 |       |

Table S3. Regression model of moose harvest (t) against moose harvest (t-1)[ml] for subunit D of GMU 13, south-central Alaska, USA, 1983–2020. In addition to model coefficients, model  $r^2$  value, and Durbin-Watson statistic (DW) are provided.

| Model | $B_0$ | ml    | $r^2$ | DW    |
|-------|-------|-------|-------|-------|
| ml    | 43.4  | 0.457 | 0.180 | 2.202 |

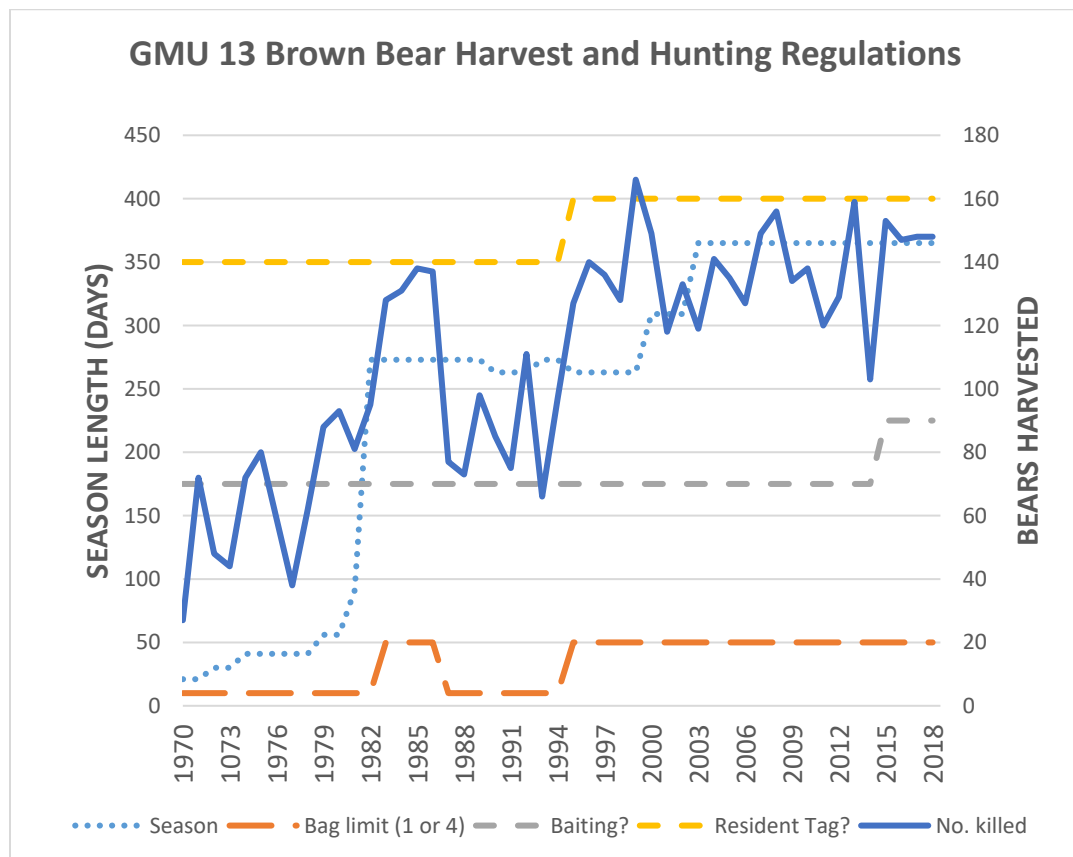

Figure S1. Trends in annual number of brown bears harvested in GMU 13 overlain on extant hunting regulations. Bag limit (annual quota) is either 1 per every 4 years (lower horizontal line) or 1 per year (upper line), baiting allowed is either “no” (lower horizontal line) or “yes” (upper line), hunting tag (US \$25 for residents) is either “yes” (lower horizontal line) or “no” (upper line), season is number of days open for hunting.
